# Supplementary material for: Comparative Prey Spectra Analyses on the Endangered Aquatic Carnivorous Waterwheel Plant (Aldrovanda vesiculosa, Droseraceae) at Several Naturalized Microsites in the Czech Republic and Germany
Source: PubMed Central journal article supplement (PMC7671111; doi:10.1093/iob/oby012), 2019-03-25
Supplement: oby012_supp.pdf [file oby012_supp.pdf]

**Supplementary Table 1:** Correlation values for the analysis of trap vs. prey size and the analysis prey item vs. water depth of the microsite.

|                                            | test                 | $R^2/r_{sp}$ | p            |
|--------------------------------------------|----------------------|--------------|--------------|
| Prey size vs. trap size                    | Linear model         | -0.00054     | 0.33817      |
| Prey variance vs. trap size                | Kruskal Wallis       | -            | 0.9682       |
| Water depth vs. prey variance (Cladocera)  | Spearman correlation | -0.8539      | 0.007        |
| Water depth vs. prey variance (other taxa) | Spearman correlation | -0.034-0.531 | 0.1412-0.931 |
